# Supplementary material for: Propagation of Rhinovirus C in Differentiated Immortalized Human Airway HBEC3-KT Epithelial Cells
Source: PubMed Central journal article supplement (PMC6466094; doi:10.3390/v11030216), 2019-03-04
Supplement: viruses-11-00216-s001.pdf [file viruses-11-00216-s001.pdf]

## Supplementary Information

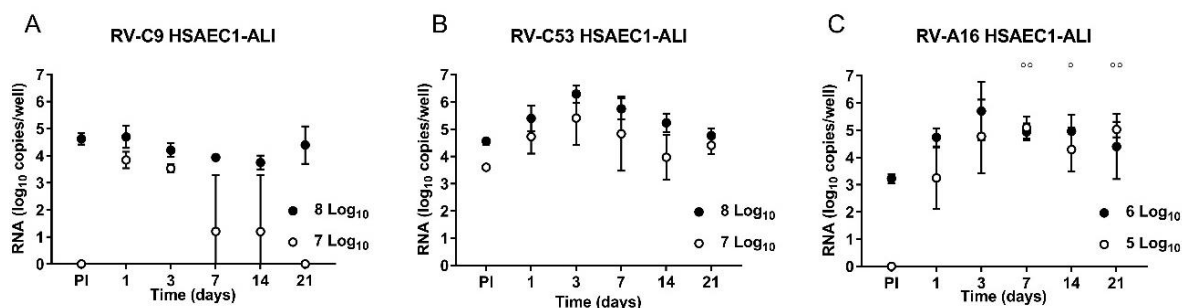

**Figure S1.** Growth properties of rhinoviruses (RVs) in HSAEC1 air-liquid-interface (ALI) culture. For this, 8 or 6 (filled circles) and 7 or 5 (open circles)  $\log_{10}$  RNA copies/well of RV-C9 and -C53 or RV-A16, respectively, were inoculated onto HSAEC1-ALI cultures (A, B, and C). Data are expressed as log copies of RNA per well ( $n = 3$ ) at 1, 3, 7, 14, and 21 day(s) after inoculation. PI represents the collected third wash solution. Differences in log RNA copies were analyzed by one-way ANOVA followed by Tukey's multiple comparisons test. Asterisks (\*) and circles ( $\circ$ ) show differences between PI and each time point within 8  $\log_{10}$  RNA copies/well of RV-Cs/6  $\log_{10}$  RNA copies/well of RV-A inoculated groups and within 7  $\log_{10}$  RNA copies/well of RV-Cs/5  $\log_{10}$  RNA copies/well of RV-A inoculated groups. \*/ $\circ$   $p < 0.05$ , \*\*/ $\circ\circ$   $p < 0.01$ , \*\*\*/ $\circ\circ\circ$   $p < 0.001$ , and \*\*\*\*/ $\circ\circ\circ\circ$   $p < 0.0001$ .

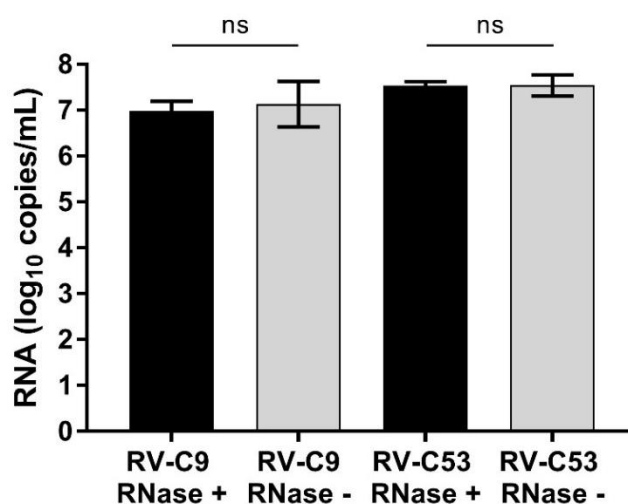

**Figure S2.** Comparison of RNA amounts between RNase-treated (+) and -untreated (-) RV-C9 and -C53 samples. Data are expressed as log copies of RNA per mL ( $n = 3$ ). Differences in log RNA copies were analyzed by paired t tests for each RV. "ns" indicates not significant.

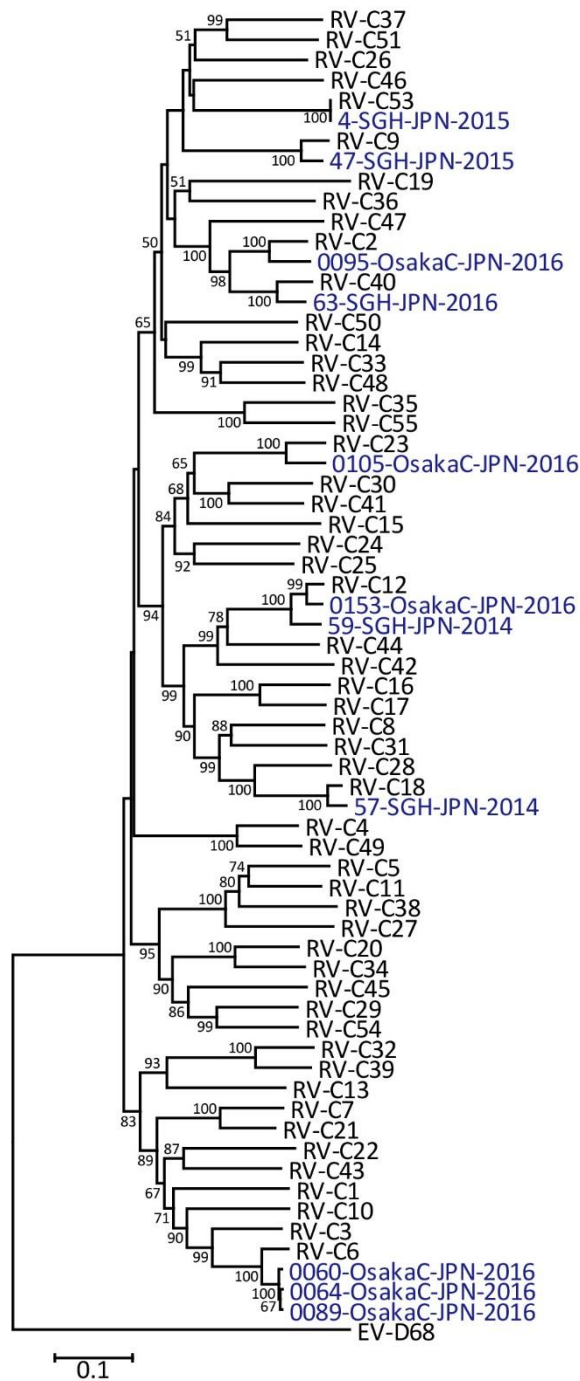

**Figure S3.** Phylogenetic analysis of the VP1 genes of the clinical isolates and prototypes of RV-C. The trees were constructed by a neighbor-joining method using the MEGA6 software and bootstrap values (>50%), calculated from 500 replicates and are shown to the left of the nodes. Evolutionary distances were computed using the Kimura 2-parameter method. Bars, 0.1 nt substitutions per site. VP1 sequences of clinical isolates were deposited at the National Center for Biotechnology Information (NCBI; accession numbers LC428164–LC428174). The sequence data of the prototypes were obtained from NCBI according to the proposal described previously [3] and the VP1 sequences of RV-C53 prototypes were obtained from NCBI (accession number MF775367). The VP1 sequence of Enterovirus D68 (EV D68) was also obtained from NCBI (accession number AY426531).

**Table S1.** Primers for sequencing the VP1 region.

| Name             | Sequence (5' to 3')            | Virus isolate        |
|------------------|--------------------------------|----------------------|
| HRVC02 VP1 F     | GATACACCAATGATCAAACAACCTG      | 0095-OsakaC-JPN-2016 |
| HRVC02 VP1 R     | TTGTTCTGTGTGAACAAATAGGTCAC     |                      |
| HRVC16-060 VP1 F | TCAAACAGCATTGTATCCAATGGAACCTAC | 0060-OsakaC-JPN-2016 |
| HRVC16-060 VP1 R | GTTAGGTTGATTGGGTAGTATCTGTCCCTG |                      |
| HRVC06 VP1 F     | GACACACCTATGATGAGACAGGATG      | 0064-OsakaC-JPN-2016 |
| HRVC06 VP1 R     | GATGGCTTCCTTCGTGTGAAC          | 0089-OsakaC-JPN-2016 |
| HRVC12 VP1 F     | AAGAGACACACCCATGATGAAGC        | 0153-OsakaC-JPN-2016 |
| HRVC12 VP1 R     | GGTATAAATTGCATCCTTAGTATGGACATG |                      |
| HRVC14-59 VP1 F  | GGTCAGGTAGTATAACCCTCACTTTCATG  | 59-SGH-JPN-2014      |
| HRVC14-59 VP1 R  | GCAACCTACTGTGCAGTCACATGTAGGTAT |                      |
| HRVC23 VP1 F     | CCTGTCCAGACATGTCAGTTAGAATG     | 0105-OsakaC-JPN-2016 |
| HRVC23 VP1 R     | TGTTAAATGGGCGCACATGTACTTA      |                      |
| HRVC40 VP1 F     | AATGGCTAAACAACCTGACAACAATATC   | 63-SGH-JPN-2016      |
| HRVC40 VP1 R     | CTGTAGATGGCCTGTTGTGTGTGTAC     |                      |

**Table S2.** Clinical isolates of RV-Cs.

| Virus isolate name   | Pairwise nucleotide p-distances compared to prototype <sup>a</sup> | Type |
|----------------------|--------------------------------------------------------------------|------|
| 0095-OsakaC-JPN-2016 | 0.092                                                              | C2   |
| 0060-OsakaC-JPN-2016 | 0.056                                                              | C6   |
| 0064-OsakaC-JPN-2016 | 0.057                                                              | C6   |
| 0089-OsakaC-JPN-2016 | 0.057                                                              | C6   |
| 47-SGH-JPN-2015      | 0.059                                                              | C9   |
| 0153-OsakaC-JPN-2016 | 0.040                                                              | C12  |
| 59-SGH-JPN-2014      | 0.064                                                              | C12  |
| 57-SGH-JPN-2014      | 0.040                                                              | C18  |
| 0105-OsakaC-JPN-2016 | 0.092                                                              | C23  |
| 63-SGH-JPN-2016      | 0.075                                                              | C40  |
| 4-SGH-JPN-2015       | 0.000                                                              | C53  |

<sup>a</sup>P-distances were calculated using the same sequence data of the prototypes used in Figure S3 with MEGA6 software.
